# Supplementary material for: Safety of Propofol versus Nonpropofol-Based Sedation in Children Undergoing Gastrointestinal Endoscopy: A Systematic Review and Meta-Analysis
Source: Hindawi journal article supplement (doi:10.1155/2018/6501215), 2018-07-30
Supplement: f1 [file 6501215.f1.pdf]

## Supplemental Material

### **Risk of bias assessment**

#### **Study: Prunty M, 2016**

##### Selection

1. Representation of the exposed cohort ( d)
2. Selection of the non-exposed cohort (a )\*
3. Ascertainment of exposure (a )\*
4. Demonstration that outcomes of interest was not present at start of study (a)\*

##### Comparability

1. Comparability of cohorts on the basis of the design or analysis: No description of controlled variables

##### Outcome

1. Assessment of Outcome (d)
2. Was follow-up long enough for outcomes to occur (a)\*
3. Adequacy of follow up of cohorts (a)\*

**Total Newcastle-Ottawa score: 5**

#### **Study: Singh et al, 1996**

##### Selection

1. Representation of the exposed cohort (d)
2. Selection of the non-exposed cohort (a)\*
3. Ascertainment of exposure (a)\*
4. Demonstration that outcomes of interest were not present at start of study (a)\*

##### Comparability

1. Comparability of cohorts on basis of design or analysis: No description

### Outcome

1. Assessment of outcome (d)\*
2. Was follow-up long enough for outcomes to occur (a)\*
3. Adequacy of follow-up of cohorts

**Total Newcastle-Ottawa score: 5**

### **Study: Hammer G, 2009**

### Selection

1. Representation of the exposed cohort (b) \*
2. Selection of the non-exposed cohort (a)\*
3. Ascertainment of exposure (a)\*
4. Demonstration that outcomes of interest was not present at start of study (a) \*

### Comparability

1. Comparability of cohorts on the basis of the design or analysis: No discussion of controlling for other variables.

### Outcome

1. Assessment of Outcome (b)\*
2. Was follow-up long enough` for outcomes to occur (a)\*
3. Adequacy of follow up of cohorts (a)\*

**Total Newcastle-Ottawa score: 7**

### **Study: Garah, 2015**

### Selection

5. Representation of the exposed cohort (a) \*
6. Selection of the non-exposed cohort (a)\*

7. Ascertainment of exposure (a)\*

8. Demonstration that outcomes of interest was not present at start of study (a)\*

Comparability

2. Comparability of cohorts on the basis of the design or analysis: Did not control for other variables.

Outcome

4. Assessment of Outcome (b)\*

5. Was follow-up long enough` for outcomes to occur (a)\*

6. Adequacy of follow up of cohorts (a)\*

**Total Newcastle-Ottawa score: 7**

**Hasanin. A, 2014**

| Domain                   | Risk of Bias | Comments                                    |
|--------------------------|--------------|---------------------------------------------|
| Sequence generation      | Unclear      | No mention of method of randomization.      |
| Allocation concealment   | Unclear      | No mention of method of allocation process. |
| Blinding of participants | Unclear      | No mention of blinding of patient.          |

|                                 |      |                                                         |
|---------------------------------|------|---------------------------------------------------------|
| Personnel and outcome assessors | High | No independent blinded assessor.                        |
| Incomplete outcome data         | Low  | Occurred in outpatient setting. No long term follow-up. |
| Selective outcome reporting     | Low  | Reported all outcomes.                                  |
| Other sources of bias           | Low  | No other noted sources of bias                          |

**Barbi et al. 2003**

| <b>Domain</b>                          | <b>Risk of Bias</b> | <b>Comments</b>                                                                             |
|----------------------------------------|---------------------|---------------------------------------------------------------------------------------------|
| Selection bias/<br>Sequence generation | Low                 | Computer generated randomization                                                            |
| Allocation concealment                 | Unclear             | Does not specifically address concealment, although blinding implies                        |
| Blinding of participants, personnel    | Low                 | Patients, doctor in charge of sedation and RN in charge of data collection were all blinded |

|                               |         |                                                                                                                                                                                                                                                                      |
|-------------------------------|---------|----------------------------------------------------------------------------------------------------------------------------------------------------------------------------------------------------------------------------------------------------------------------|
| Blinding of outcome assessors | Low     | RN collecting the data was unaware of drug administered                                                                                                                                                                                                              |
| Incomplete outcome data       | Unclear | Not specifically addressed<br><br>122 patients were randomized, but study states “total of 112 gastroscopies were successfully performed”. Outcome table still reports N that total 122. Unclear if data was collected on all 122 or just the 112 successful scopes. |
| Selective outcome reporting   | Low     | Primary and secondary outcomes have all been reported                                                                                                                                                                                                                |
| Other sources of bias         | Unclear | ? misclassification bias - the discomfort scale was based on observed behaviours - validity of this tool is unknown                                                                                                                                                  |

**Paspatis et al. 2006**

| Domain                                 | Risk of Bias | Comments                     |
|----------------------------------------|--------------|------------------------------|
| Selection bias/<br>Sequence generation | Low          | Table of random numbers      |
| Allocation concealment                 | Unclear      | Does not address concealment |

|                                     |         |                                                                                                                                                                                                                                          |
|-------------------------------------|---------|------------------------------------------------------------------------------------------------------------------------------------------------------------------------------------------------------------------------------------------|
| Blinding of participants, personnel | High    | Not blinded for the endoscopist or the anesthesiologist. Pediatrician was blinded.                                                                                                                                                       |
| Blinding of outcome assessors       | Unclear | The blinded pediatrician appeared to assess the efficacy, it does not address who assessed safety outcomes. Patients had continuous vital sign monitoring and an RN who was observing the patient - did not state if the RN was blinded. |
| Incomplete outcome data             | Low     | Appears that efficacy and safety data was collected on all patients (26 +28).<br><br>Discomfort scale was only collected on children over 6 years - this was clearly stated (20 + 21)                                                    |
| Selective outcome reporting         | Low     | It appears that all outcomes have been reported                                                                                                                                                                                          |
| Other sources of bias               | Low     | No obvious others                                                                                                                                                                                                                        |

**Summary of Bias:**

**Table A1:** Newcastle-Ottawa assessment of non-randomized trials for all prospective cohort studies included.

| Study         | Selection | Comparability | Outcome |
|---------------|-----------|---------------|---------|
| Singh et. al  | ***       |               | **      |
| Prunty et al. | ***       |               | **      |
| Hammer et al. | ****      |               | ***     |
| Garah et al.  | ****      |               | ***     |

|                                      | Paspatis et al. 2006 | Barbi et al. 2003 | Hasanin, A. 2014 |
|--------------------------------------|----------------------|-------------------|------------------|
| Selection bias / sequence generation | Green                | Green             | Yellow           |
| Allocation concealment               | Yellow               | Yellow            | Yellow           |
| Blinding of personnel                | Red                  | Green             | Yellow           |
| Blinding of assessors                | Yellow               | Green             | Red              |
| Incomplete outcome data              | Green                | Yellow            | Green            |
| Selective outcome reporting          | Green                | Green             | Green            |
| Other sources of bias                | Green                | Yellow            | Green            |

**Figure S1:** Assessment of randomized controlled trials using the Cochrane Risk of Bias Tool. Red indicates high risk of bias, yellow indeterminate risk of bias, green low risk of bias.
